# Supplementary material for: Flow cytometry combined with viSNE for the analysis of microbial biofilms and detection of microplastics
Source: PubMed Central journal article supplement (PMC4873979; doi:10.1038/ncomms11587), 2016-05-18
Supplement: ncomms11587-s1.pdf [file ncomms11587-s1.pdf]

# Supplementary Information

## Supplementary Figures

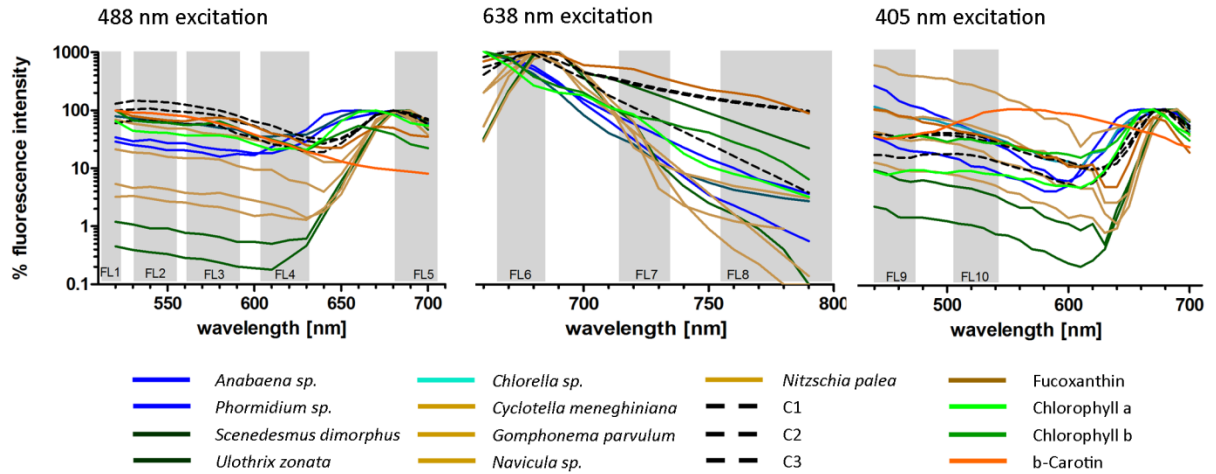

**Supplementary Figure 1** Fluorescence spectra of selected cyanobacteria, green algae, diatoms, natural communities (C1-C3), and four pigments (dissolved in ethanol). To facilitate the comparison of groups and to avoid complex colouring patterns, groups are associated with the same colour. Excitation wavelengths are indicated above the graphs.

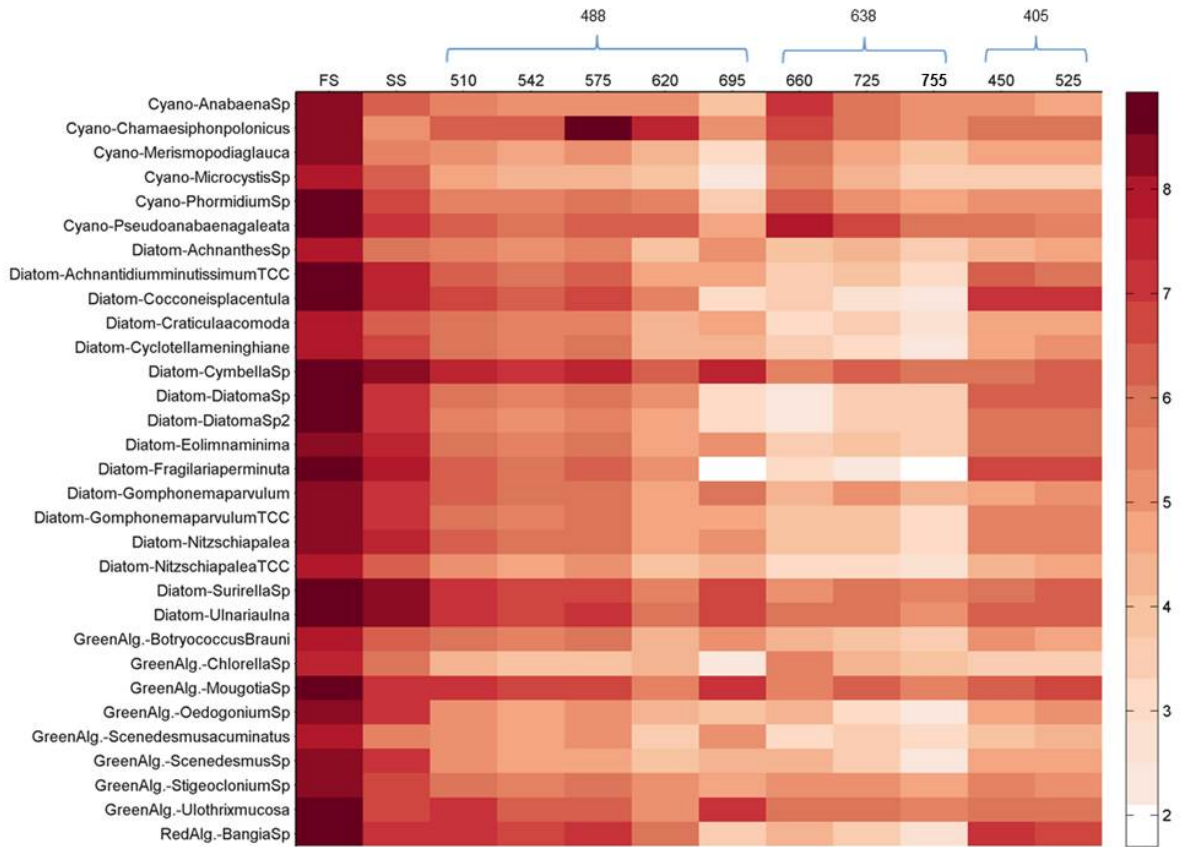

**Supplementary Figure 2** Similarity between scattering and fluorescence properties of the single species.

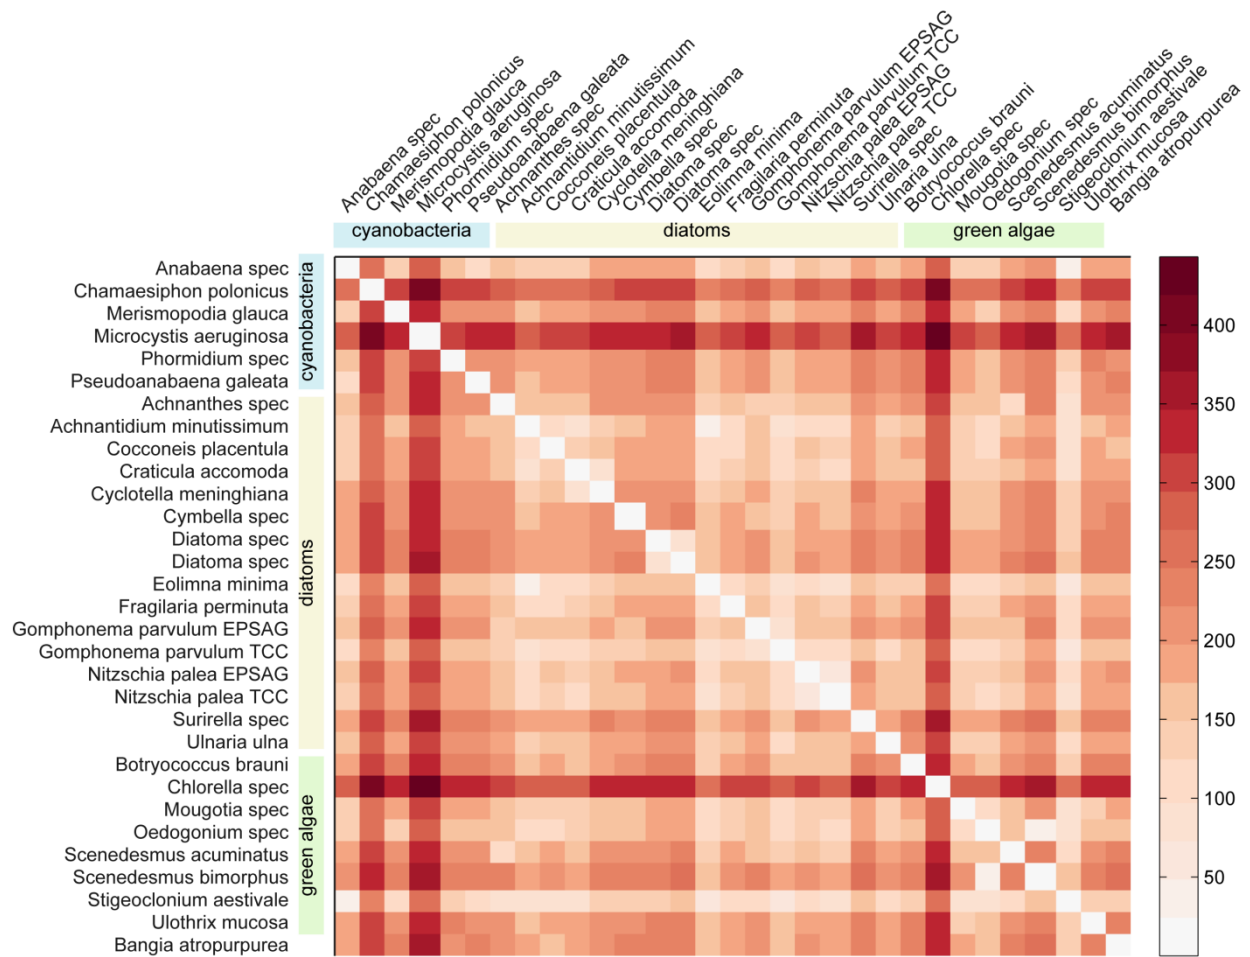

**Supplementary Figure 3** Similarity between viSNE submaps of single species. The maximum mean discrepancy (MMD) was calculated for each pair of viSNE submaps (**Figure 1a**) and is presented as a heatmap going from white (identity) to dark red (maximum discrepancy in this set). For *Diatoma*, two subcultures of the same species were used in both viSNE and MMD calculations.

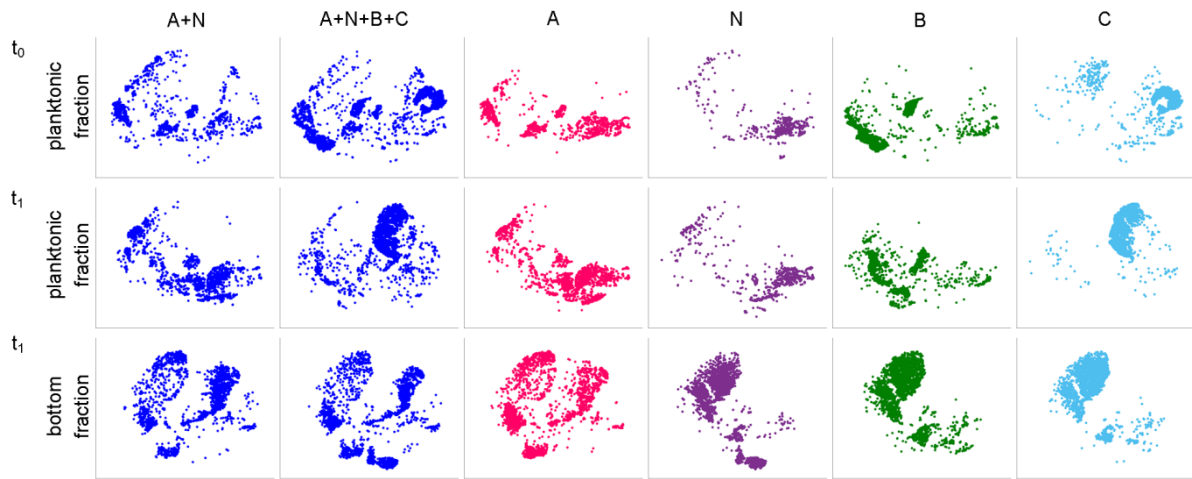

**Supplementary Figure 4** Tracking temporal shifts of subpopulations in artificial microbial communities. Two (*Achnanidium minutissimum* and *Nitzschia palea*, (A+N)) or four (A, N, *Botryococcus braunii* and *Chamaesiphon polonicus*, (A+N+B+C)) single species were mixed ( $n = 3$ ) and assessed by flow-cytometry immediately ( $t_0$ ) after mixing and after one week ( $t_1$ ). Single species cultures were used as control ( $n = 3$ ). At  $t_0$  the community was planktonic and composed of the single species, whereas at  $t_1$  species and their subpopulations have segregated into planktonic and bottom fractions.

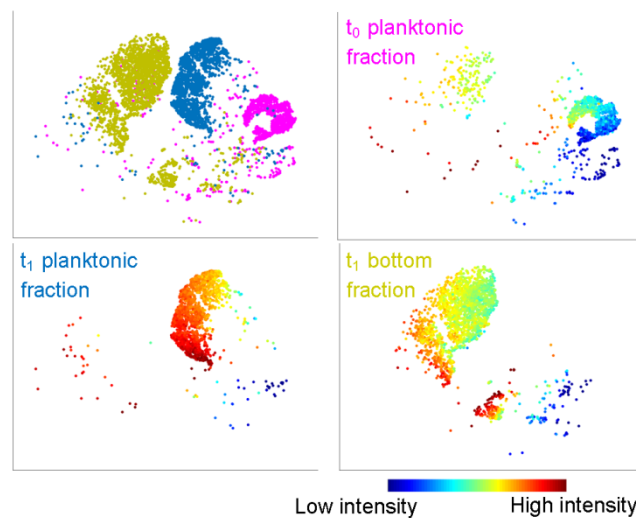

**Supplementary Figure 5** Temporal structural changes in *Chamaesiphon polonicus* cultures. Overlay of viSNE submaps of the planktonic fraction of *Chamaesiphon polonicus* ( $n = 3$ ) at the start of the experiments ( $t_0$ ) and of the planktonic and bottom fraction after one week ( $t_1$ ), also individually colored according to fluorescence at 695 nm measured by flow cytometry.

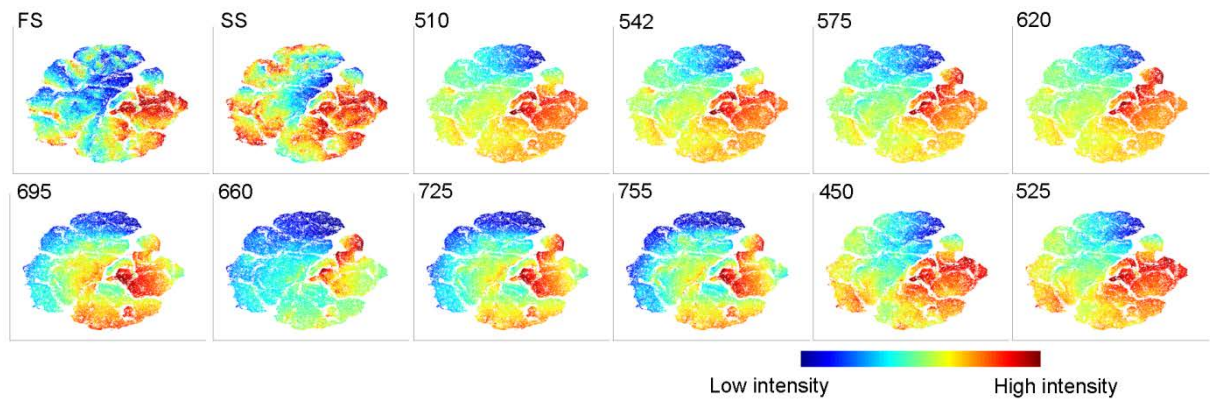

**Supplementary Figure 6** viSNE map shown in **Figure 2a**, colored according to optical scatter (forward scatter FS and sideward scatter SS) and fluorescence intensity at specific wavelengths [nm] measured by flow-cytometry (**Supplementary Table 10**).

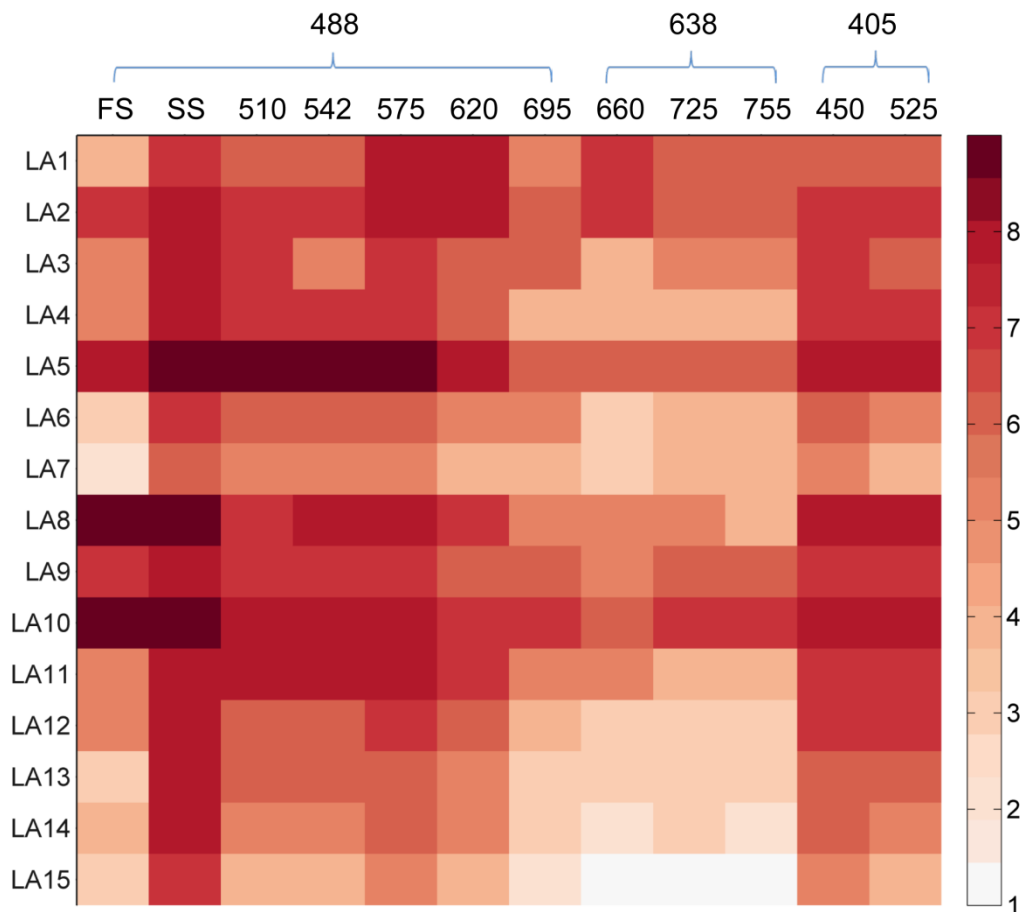

**Supplementary Figure 7** Heatmap of optical scatter and fluorescence intensities of each subpopulation defined in **Figure 2b**. Laser wavelength [nm] (above the) and filter wavelength [nm] are shown at top of the figure.

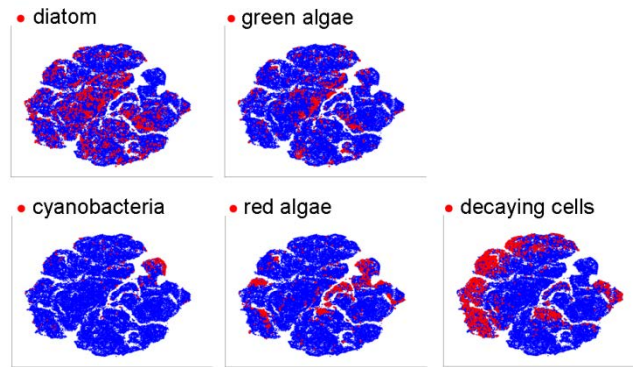

**Supplementary Figure 8** Projection of flow cytometry data points taken from reference species (**Supplementary Table 1**) grouped into diatoms, green algae, cyanobacteria, red algae as well as pigment-bleached reference samples onto the viSNE map shown in **Figure 2a**.

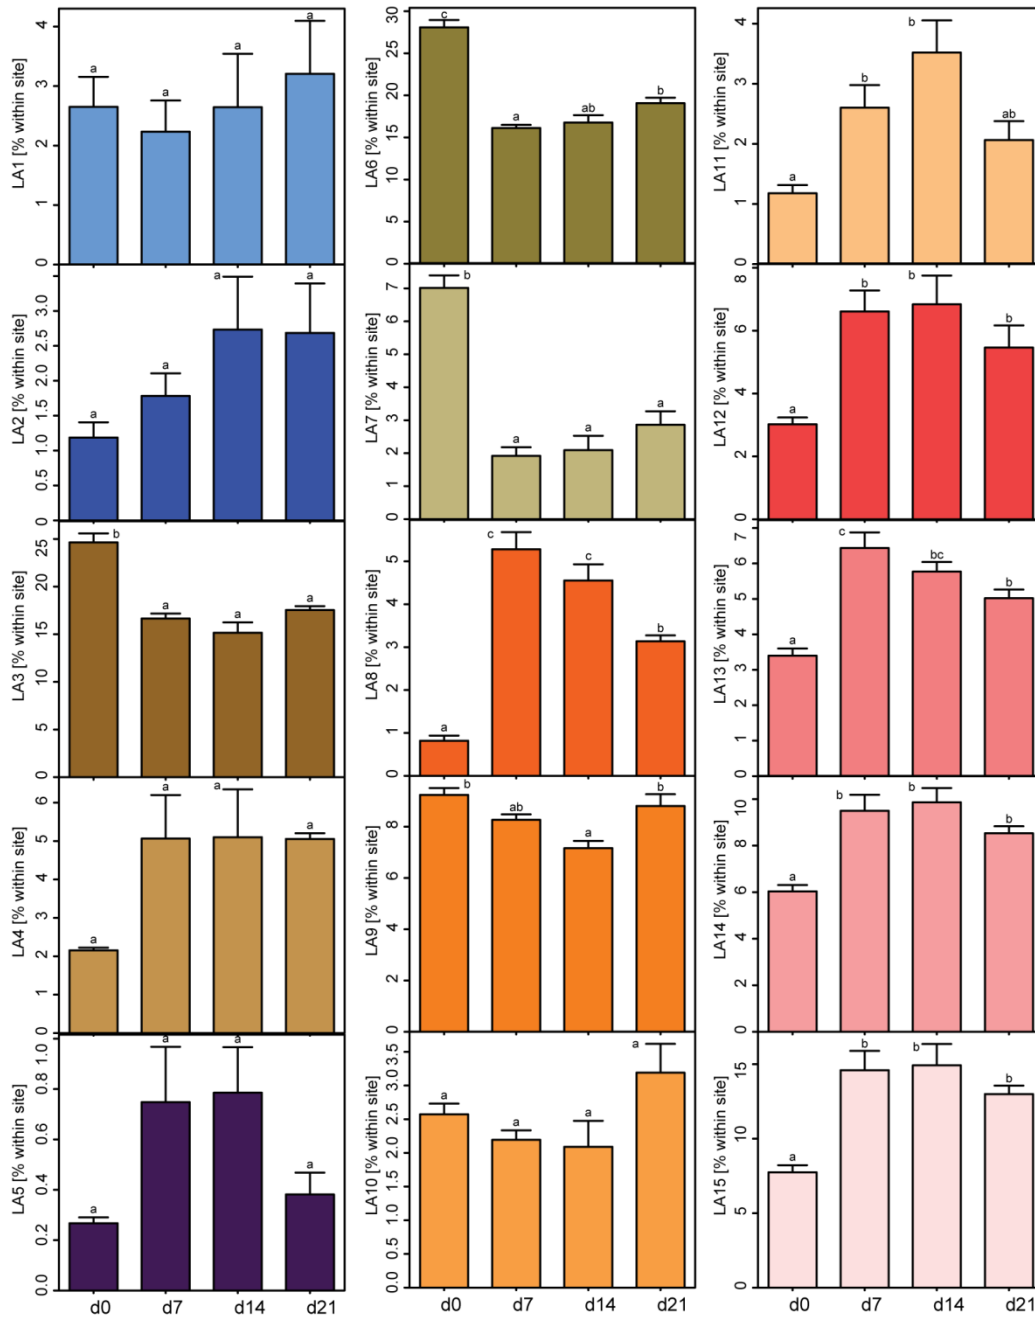

**Supplementary Figure 9** Bar plots of assigned subpopulations as shown in **Supplementary Figure 11**. Bars are divided into time points post temperature increase. Bars represent the average percentage of events in a cluster relative to all events at a specific time point (n=5). Whiskers depict standard errors. Bars that are significantly different ( $p < 0.05$ , pairwise Tukey's tests with Holm's corrected p-values for multiple comparisons) are annotated by different letters.

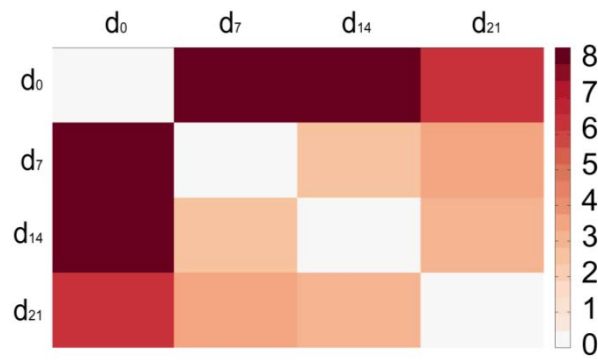

**Supplementary Figure 10** Similarity between viSNE submaps presented in **Figure 3a**. The maximum mean discrepancy (MMD) was calculated for each pair of viSNE submaps and is presented as a heatmap going from white (identity) to dark red (maximum discrepancy in this set). The mean MMD between the different time points was  $5.18 \pm 1.44$ , which was larger than the MMD between the five biological replicates ( $3.55 \pm 1.23$ ) and that of the three technical replicates per sample ( $2.20 \pm 0.95$ ).

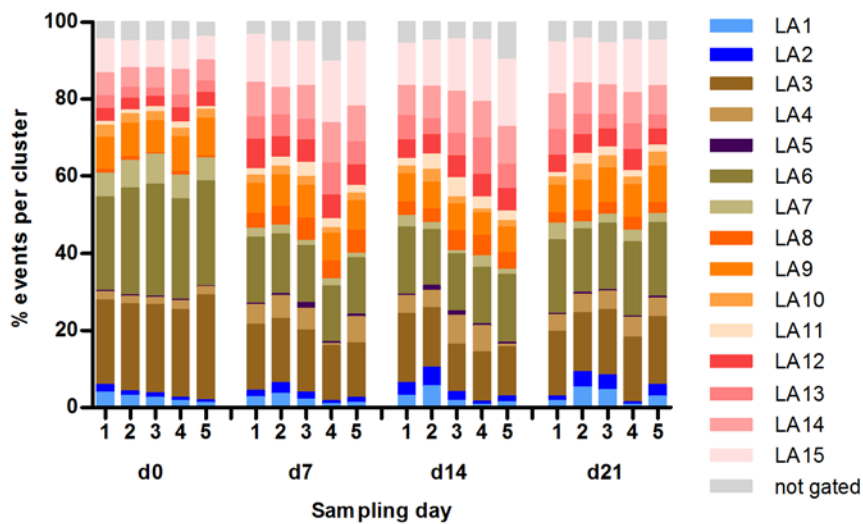

**Supplementary Figure 11** Subpopulations defined in **Figure 2b**, normalized to total number of particles for each biological replicate (n=5) for each time point post temperature increase.



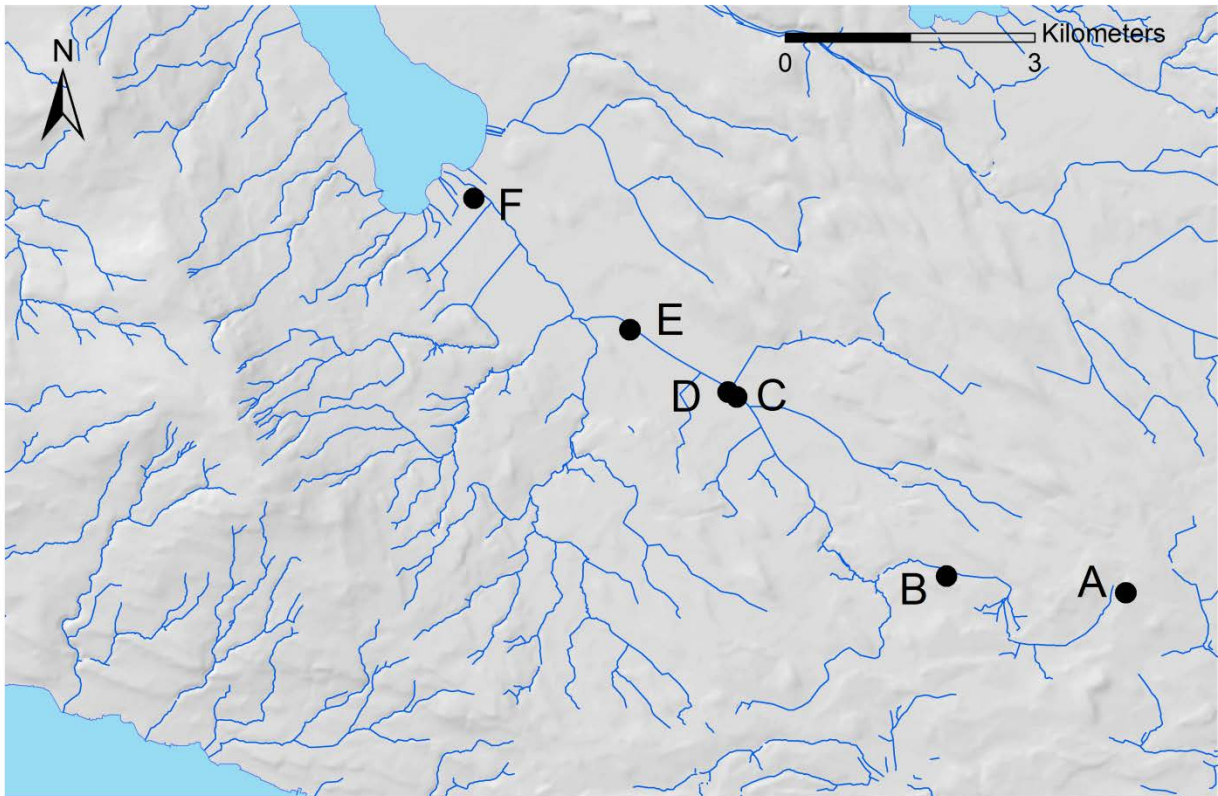

**Supplementary Figure 12** Topographical map of the Mönchaltorfer Aa catchment with the six sampling sites marked A-F. Surface waters are depicted in blue. The sites are characterized in **Supplementary Tables 3-5**. Site A is at the spring of the stream in the forest, site B is in an unshaded stretch, site C is shaded but in the straightened section of the stream like sites D-F, which are additionally influenced by wastewater treatment plant effluents, site D being situated immediately downstream a treatment plant. Map material reproduced with permission from Swisstopo using ArcGIS.

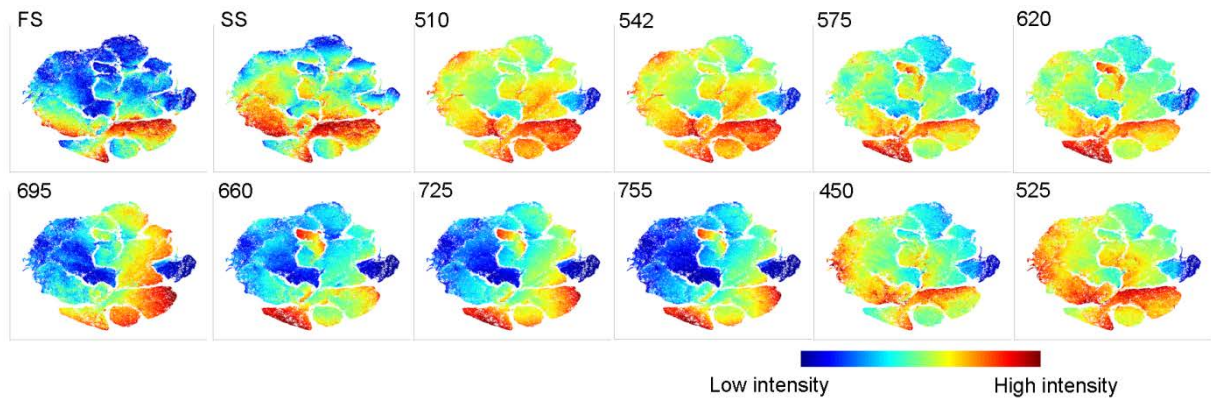

**Supplementary Figure 13** viSNE map shown in **Figure 4a**, colored according to optical scatter intensity (forward scatter, FS and sideward scatter SS) and fluorescence intensity at specific wavelengths [nm] measured by flow-cytometer (**Supplementary Table 10**).

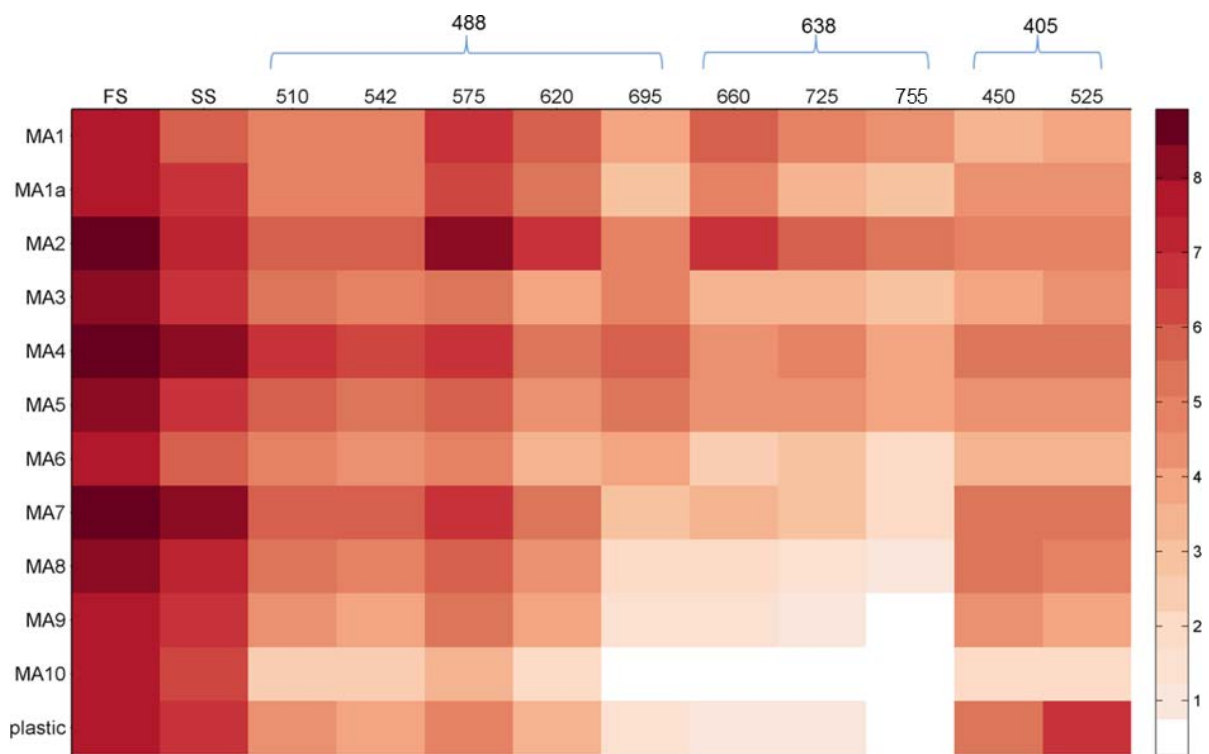

**Supplementary Figure 14** Heatmap of optical scatter and fluorescence intensities of each subpopulation defined in **Figure 4b**. Laser wavelength [nm] (top) and filter wavelength [nm] are shown on top of the figure.

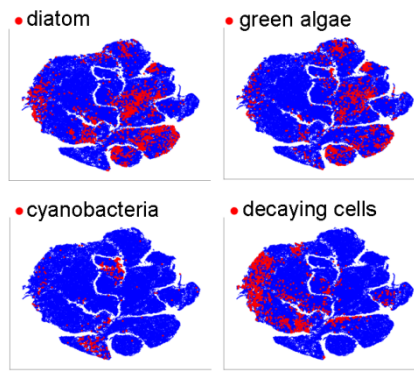

**Supplementary Figure 15** Projection (Online Methods) of flow cytometry taken from single species (**Supplementary Table 1**) grouped into diatoms, green algae, cyanobacteria as well as pigment-bleached reference samples (Online Methods) onto viSNE map shown in **Figure 4a**.

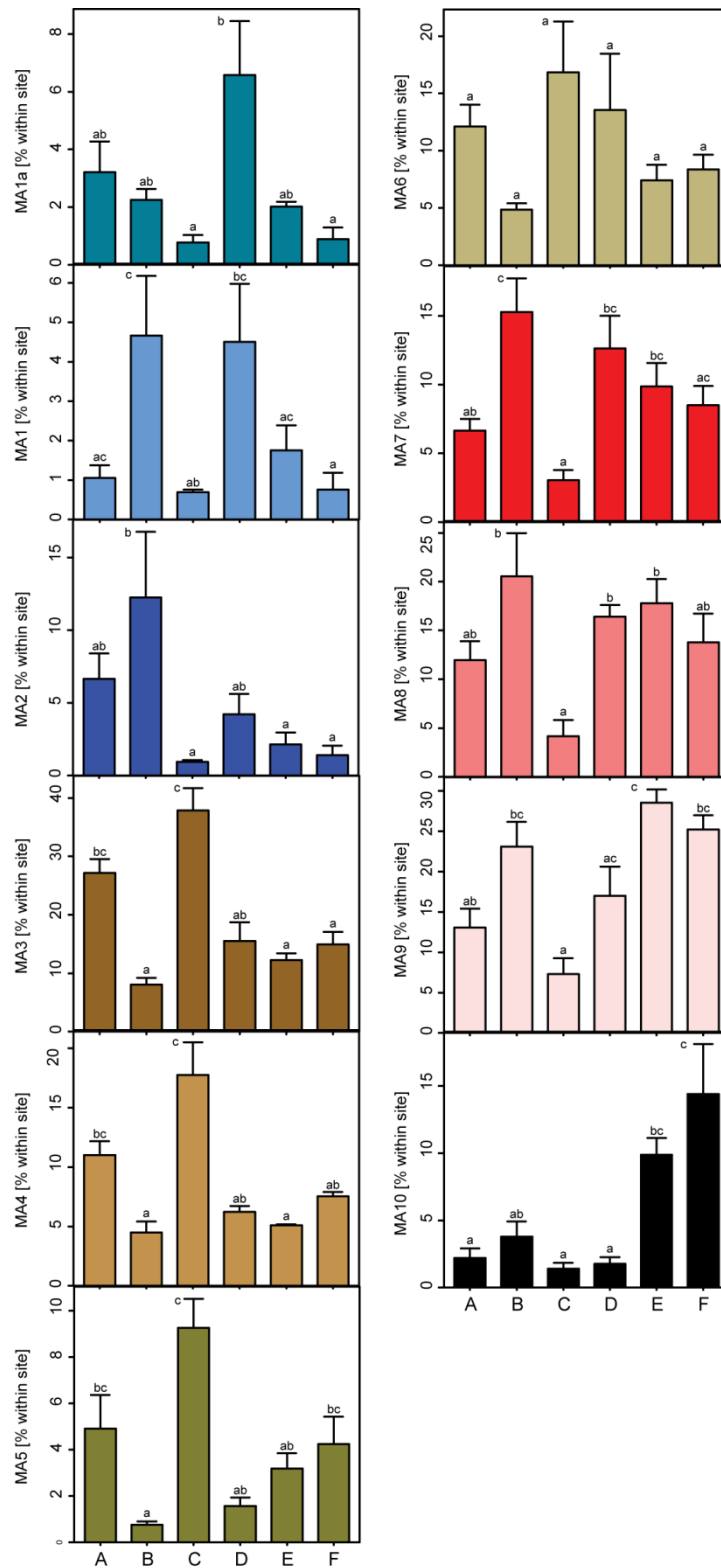

**Supplementary Figure 16** Bar plots of assigned subpopulations as shown in **Supplementary Figure 18**. Bars are divided into sampling locations. Bars represent the average percentage of events in a cluster relative to all events at a specific sampling site (n=3). Whiskers depict standard errors. Bars that are significantly different (p<0.05, pairwise Tukey's tests with Holmes corrected p-values for multiple comparisons) are annotated by different letters.

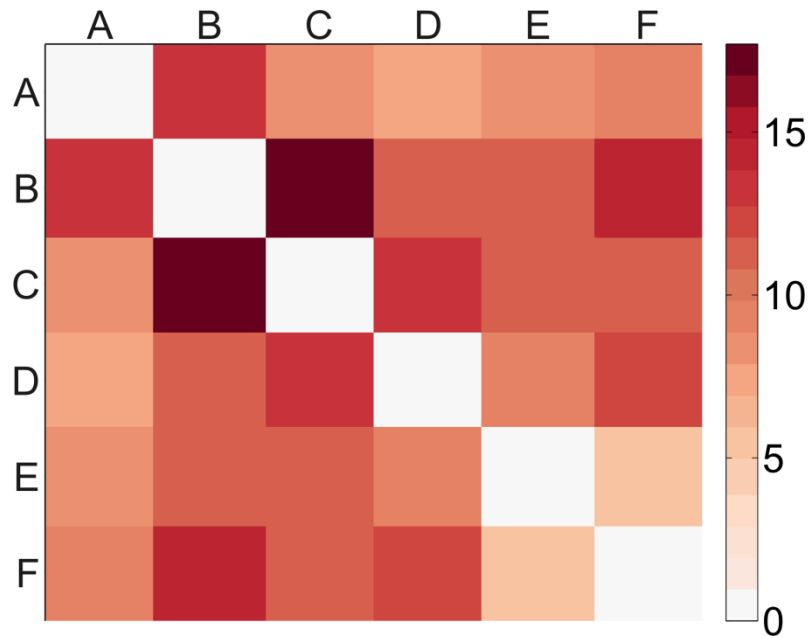

**Supplementary Figure 17** Similarity between viSNE submaps presented in **Figure 5a**. The maximum mean discrepancy (MMD) was calculated for each pair of viSNE submaps and is presented as a heatmap going from white (identity) to dark red (maximum discrepancy in this set). The mean MMD between the different sampling sites was  $13.78 \pm 4.21$ , which was larger than the MMD between the three biological replicates ( $9.73 \pm 4.34$ ) and that of the three technical replicates per sample ( $5.22 \pm 3.22$ ).

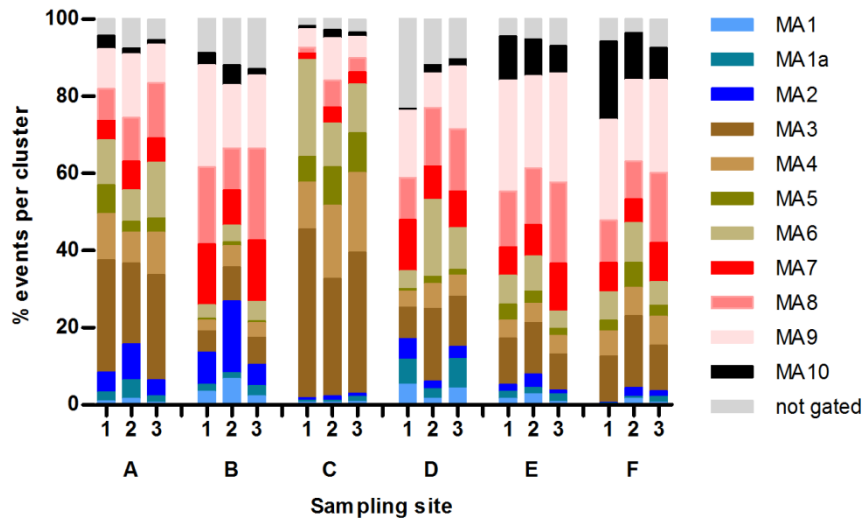

**Supplementary Figure 18** Subpopulations defined in **Figure 4b**, normalized to total number of particles for each of biological replicate (n=3) from each sampling site A-F.

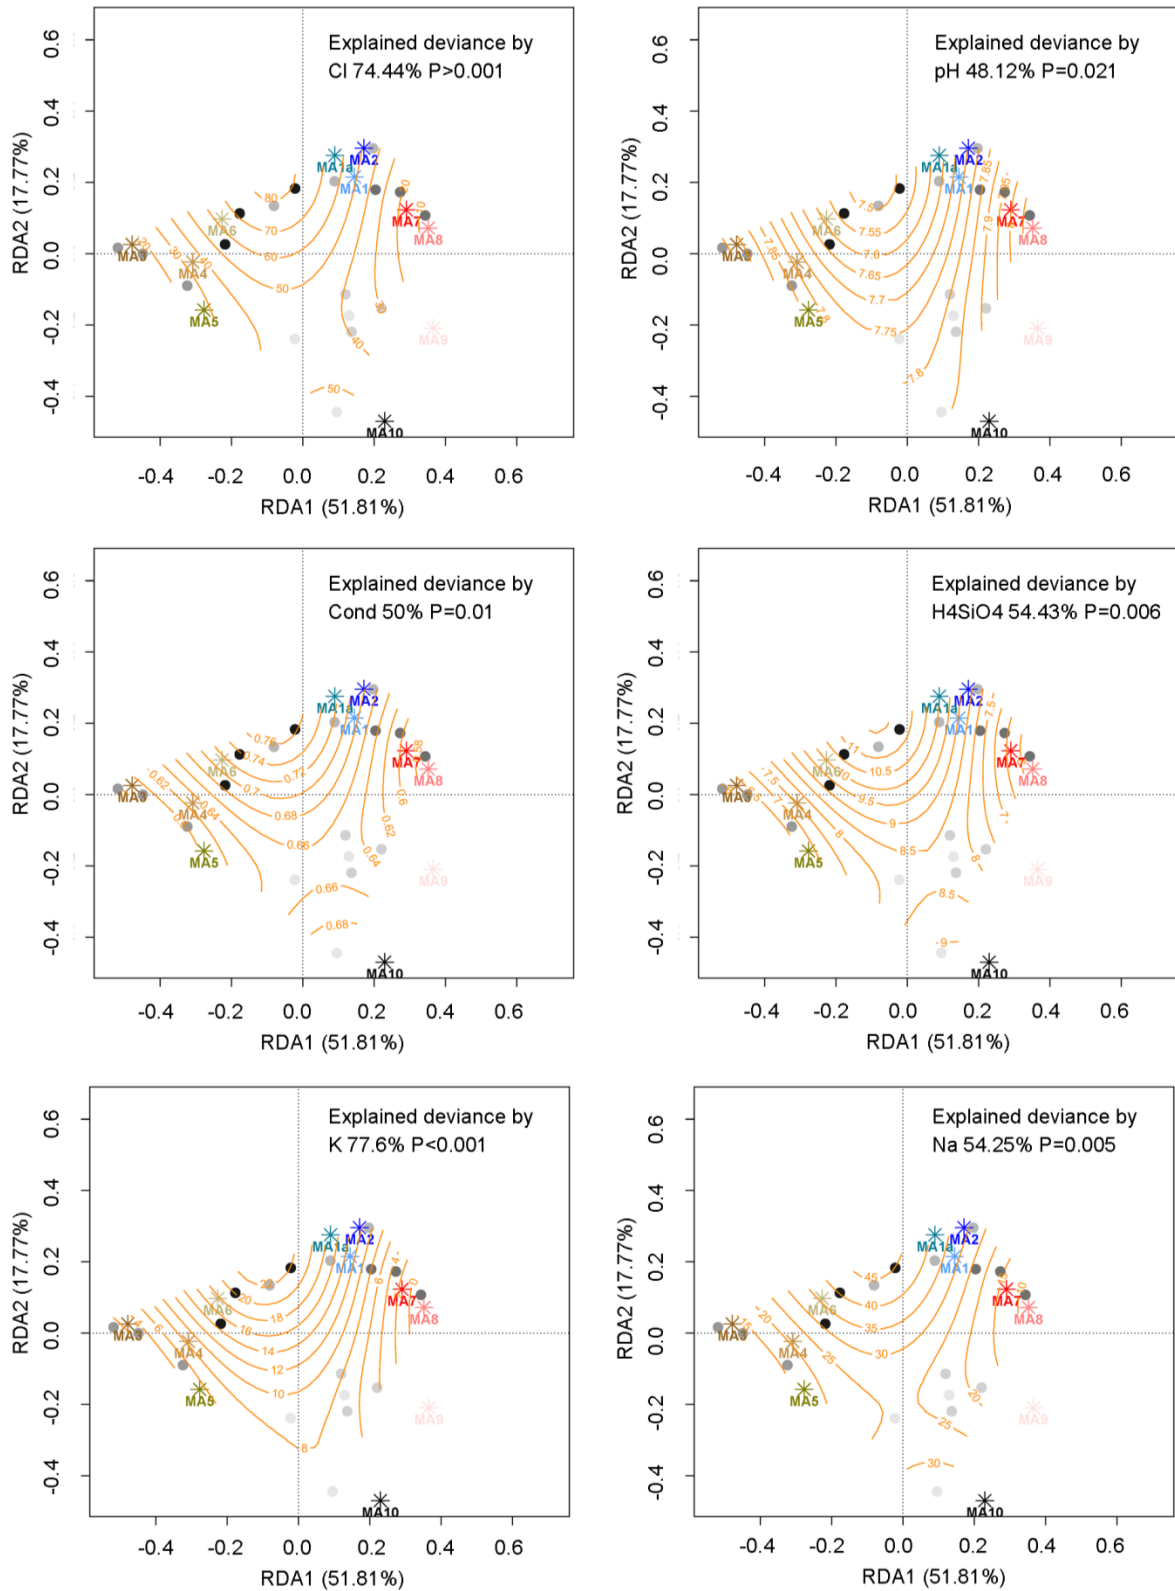

**Supplementary Figure 19** Biplots of the RDA based on the fraction of particles in the subpopulations in **Figure 4b** constrained by field forward selected physico-chemical parameters (**Supplementary Tables 3, 5**). Dots/grey tones: specific sampling sites, stars/coloured: centroids of the subpopulations (MA1-MA10). Explained variation for the first two constraint axes is given. The relation ( $r^2$ ) of chloride (Cl), potassium (K), sodium (Na) and silicate ( $H_4SiO_4$ ) concentrations as well as electrical conductivity (cond) and pH to the subpopulation structure according to general additive models (GAM; as amount of deviance accounted for) and the corresponding significance ( $p$ ) are listed in the top right corner of the plots.

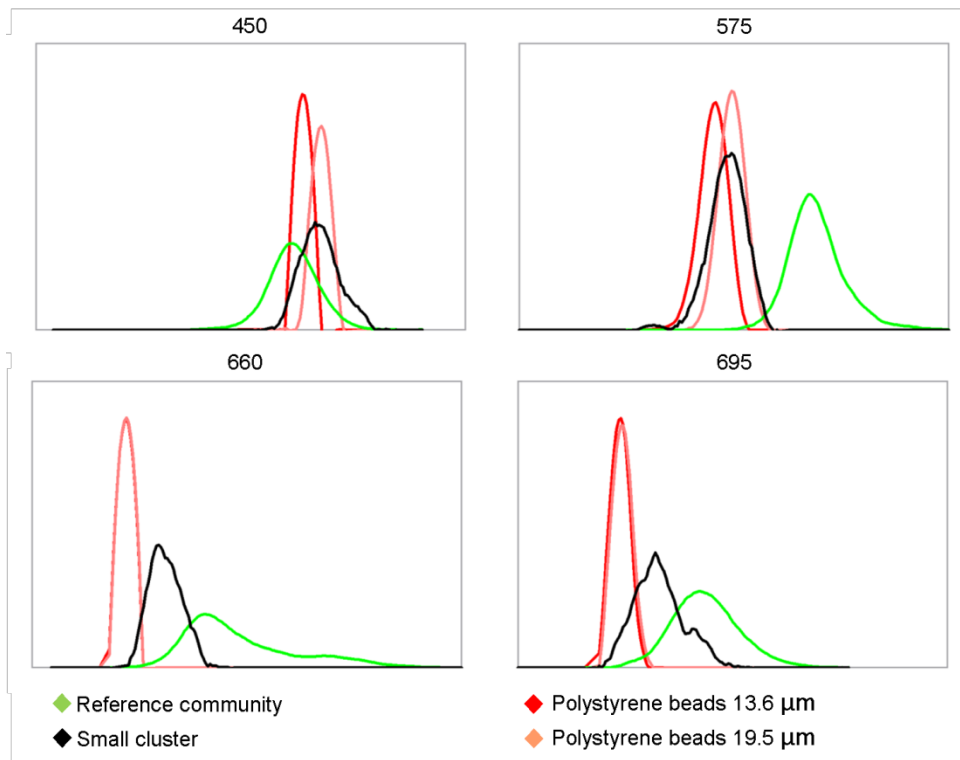

**Supplementary Figure 20** Histograms of fluorescence intensities acquired by flow cytometry at four different wavelengths [nm] of polystyrene beads (13.6 and 19.5 μm), site C as a reference site and of particles in the cluster detected in site D, highlighted in **Figure 6a**.



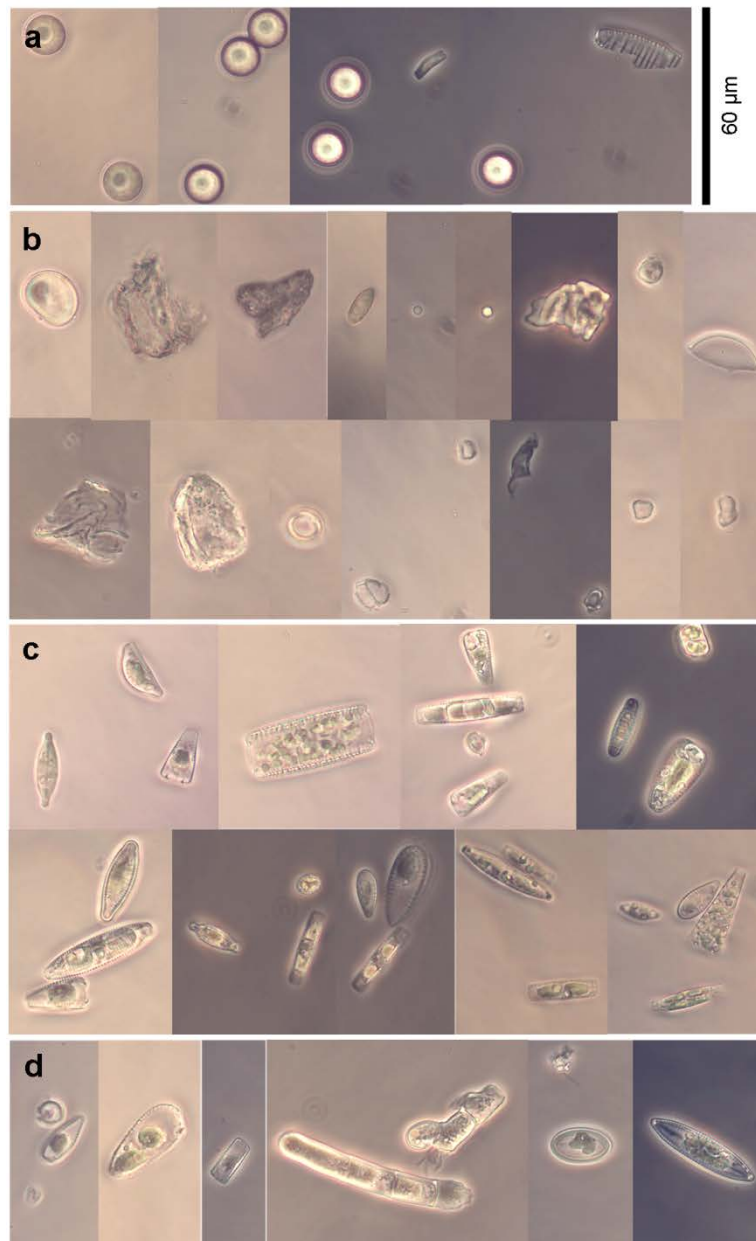

**Supplementary Figure 21** Light microscopy images of **(a,b)** isolated fractions obtained by FACS from **(c, d)** remaining fraction and **(a,c)** site control samples mixed with 13.6  $\mu\text{m}$  polystyrene beads and from **(b,d)** site D samples. All images are 60  $\mu\text{m}$  in height.

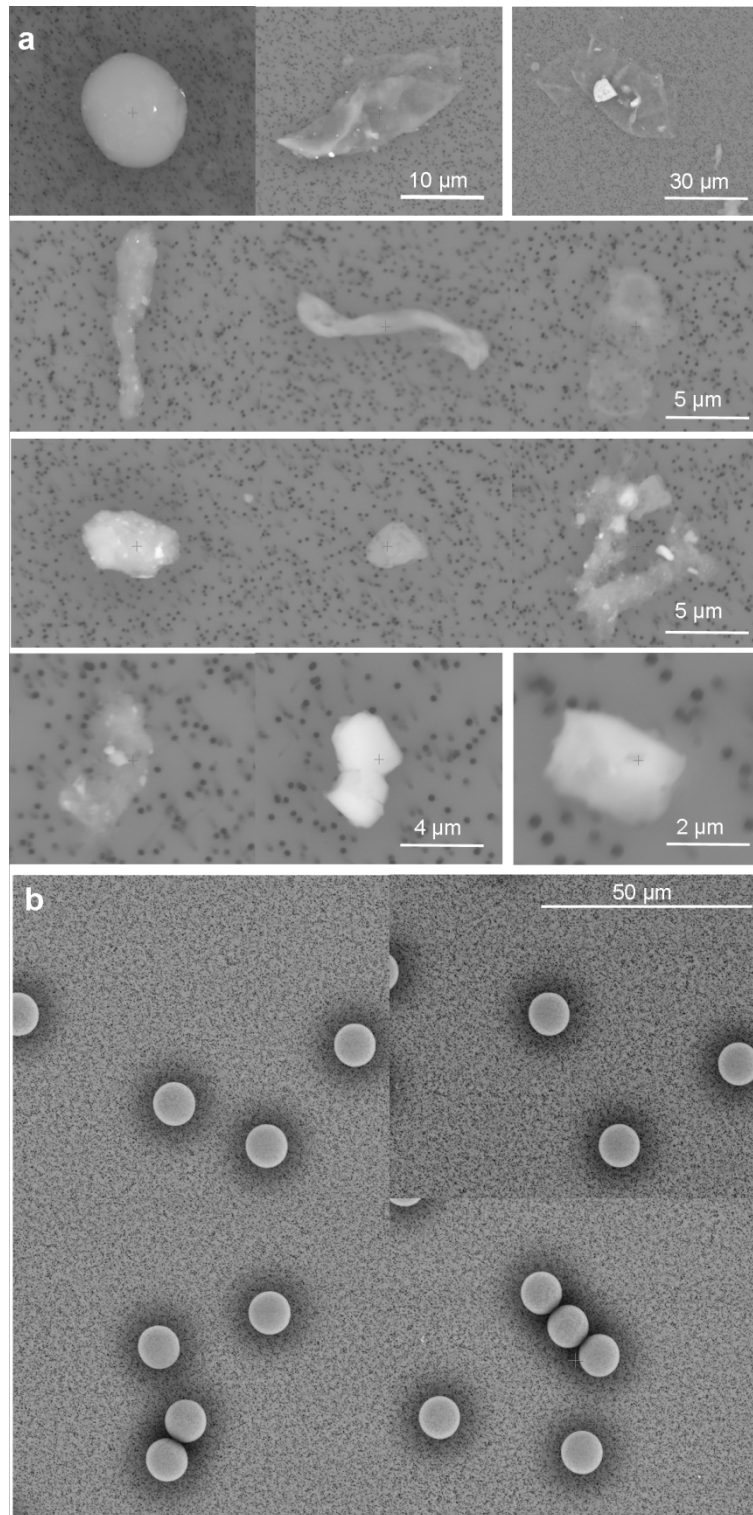

**Supplementary Figure 22** Scanning electron microscopy images of gated fractions obtained by FACS from **(a)** site D samples and **(b)** from site C samples, mixed with 13.6 μm polystyrene beads as control.

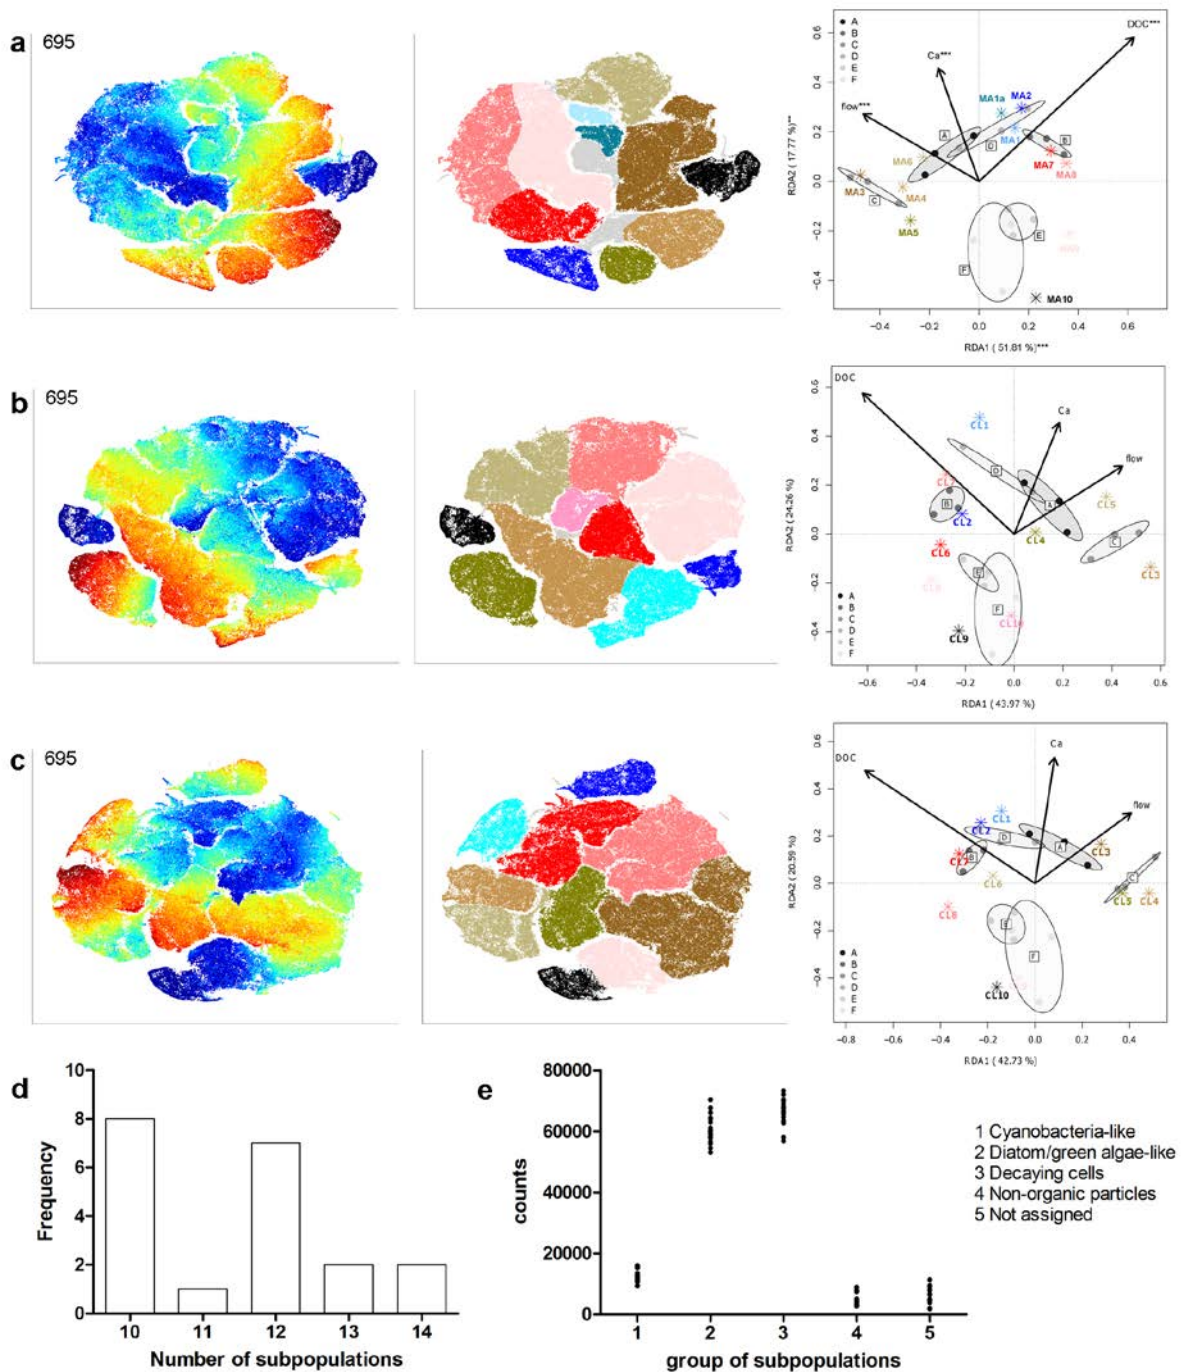

**Supplementary Figure 23** viSNE map, identified subpopulations, and RDA of subpopulations with environmental parameters analogous to **Figure 5**. **a** The same subsample as presented in the main manuscript (**Figure 5**); **b, c** Two different subsamples of the field dataset analysed in the same manner. Subpopulations of each viSNE map were analysed independently. RDA identifies the same environmental parameters as significant drivers of community structure with a similar level of explanatory power in all three subsamples; **d** The number of subpopulations characterized in a total of 20 runs are represented in a histogram while; **e** Shows a dot plot of the counts of cells categorized as cyanobacteria-like, diatoms and green algae-like, decaying, non-organic and not-assigned particles for all 20 runs.

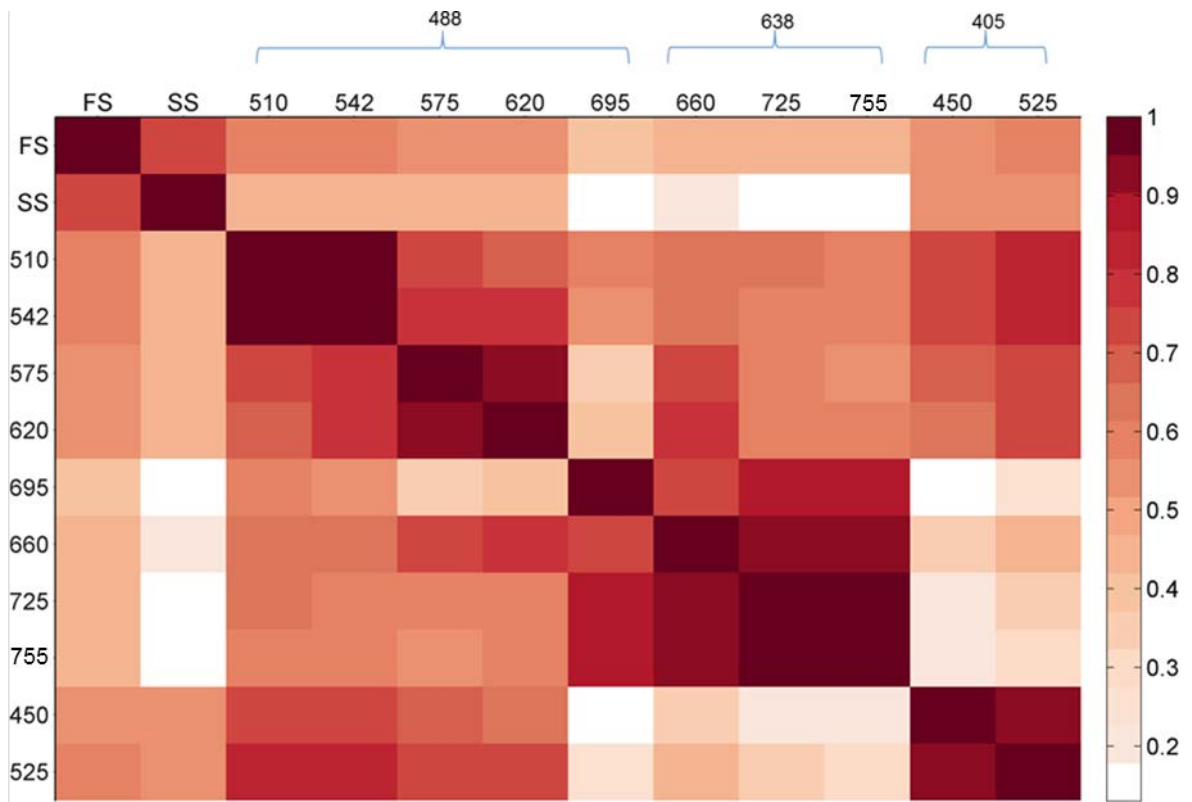

**Supplementary Figure 24** Pearson correlation between the fluorescence channels for the field biofilm samples.

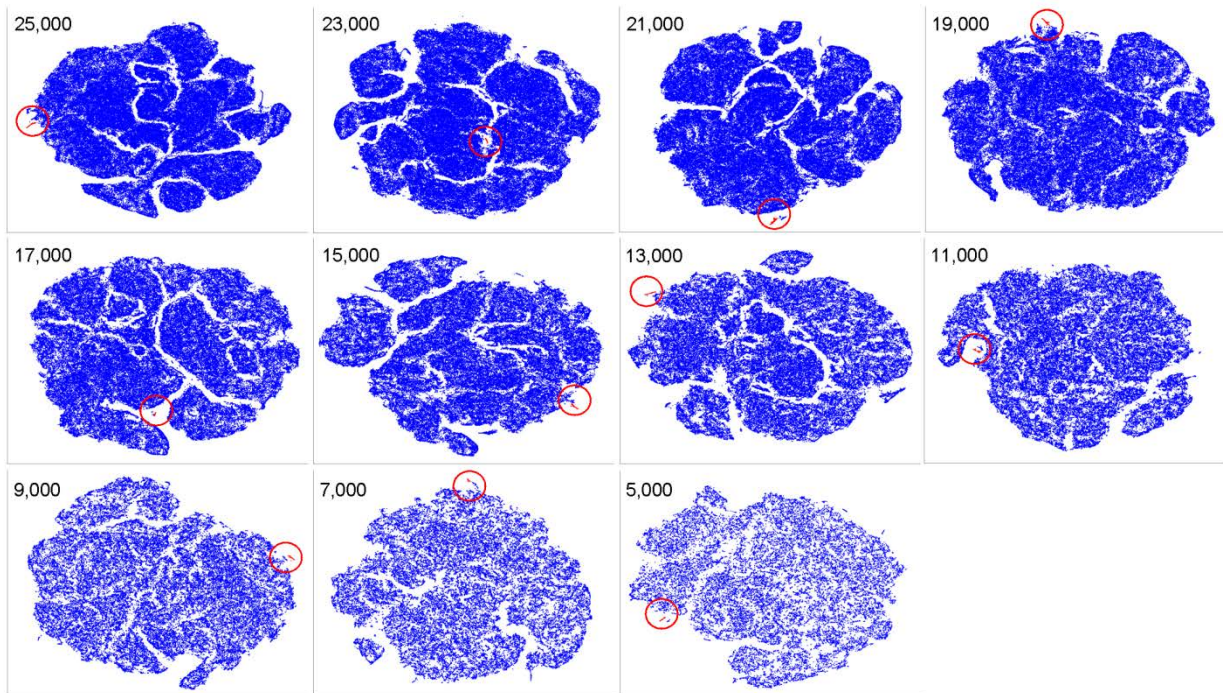

**Supplementary Figure 25** t-SNE maps of field samples successively downsampled from the original 25,000 events per sample to 5,000 events per sample. The microplastics-cluster is highlighted and circled in red in each map.



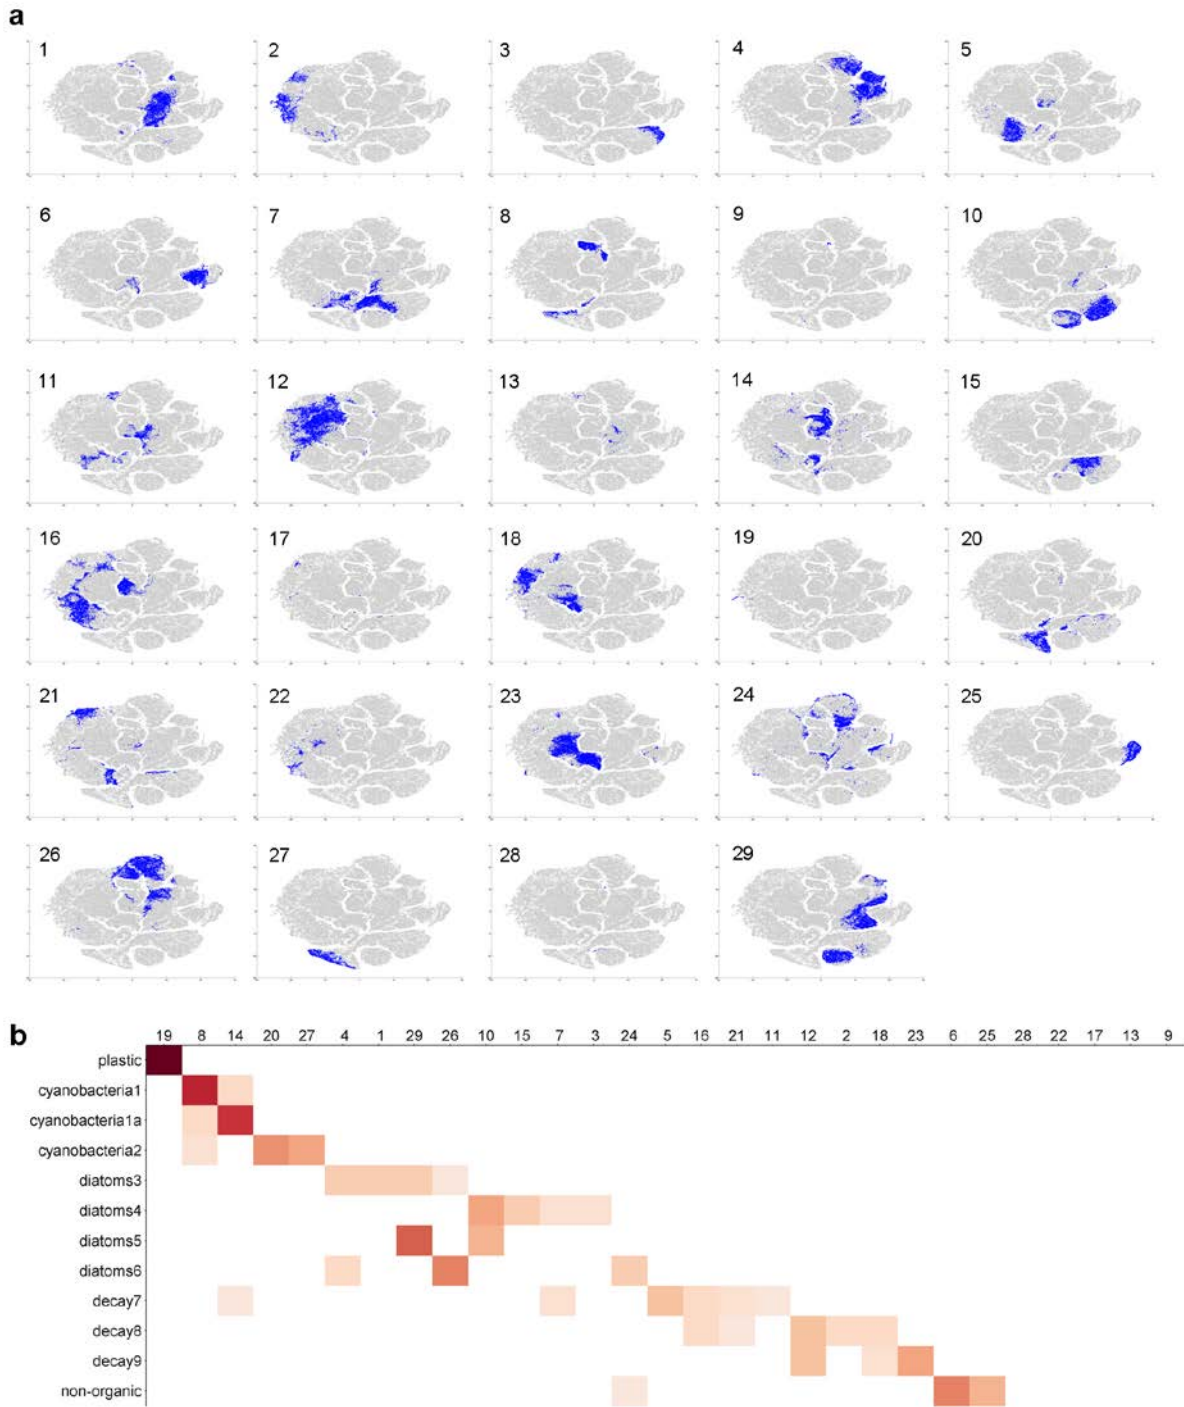

**Supplementary Figure 26** PhenoGraph cluster analysis identified 29 different clusters using the same viSNE subsample represented in the main manuscript in Figure 5. **a** The projection of the 29 PhenoGraph clusters on the viSNE map; **b** Heatmap comparing PhenoGraph clusters with viSNE subpopulations.

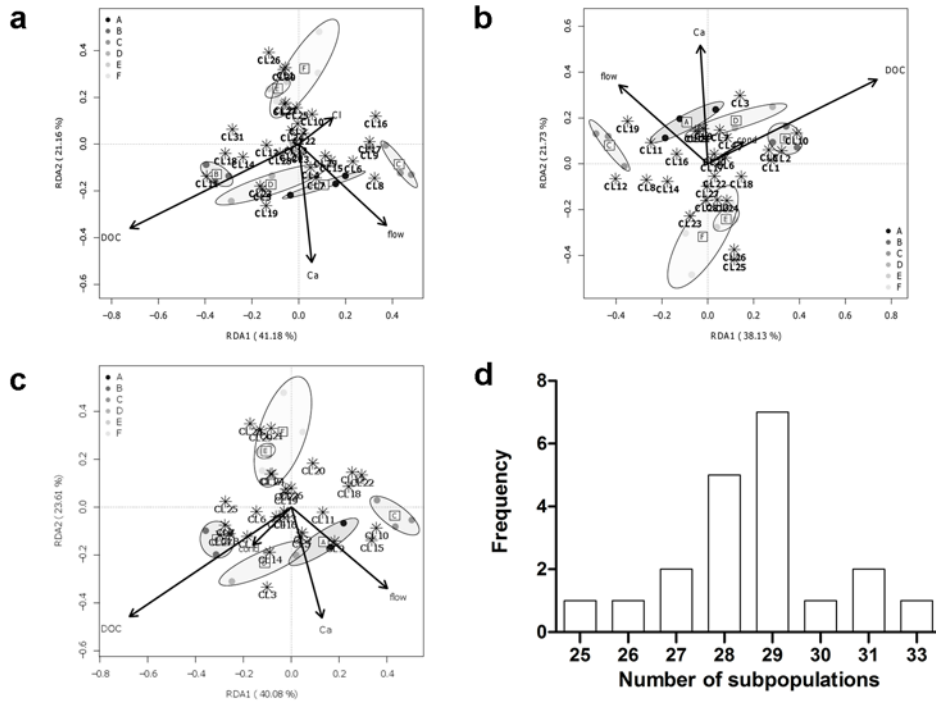

**Supplementary Figure 27** Phenograph cluster identification and further RDA analysis similar to viSNE Figure 5. a, b, c RDA analysis of different subsamples of the field dataset. Clusters of each phenograph run were analysed independently. d The histogram represent the number of clusters identified by phenograph of 20 subsamples of the field data.

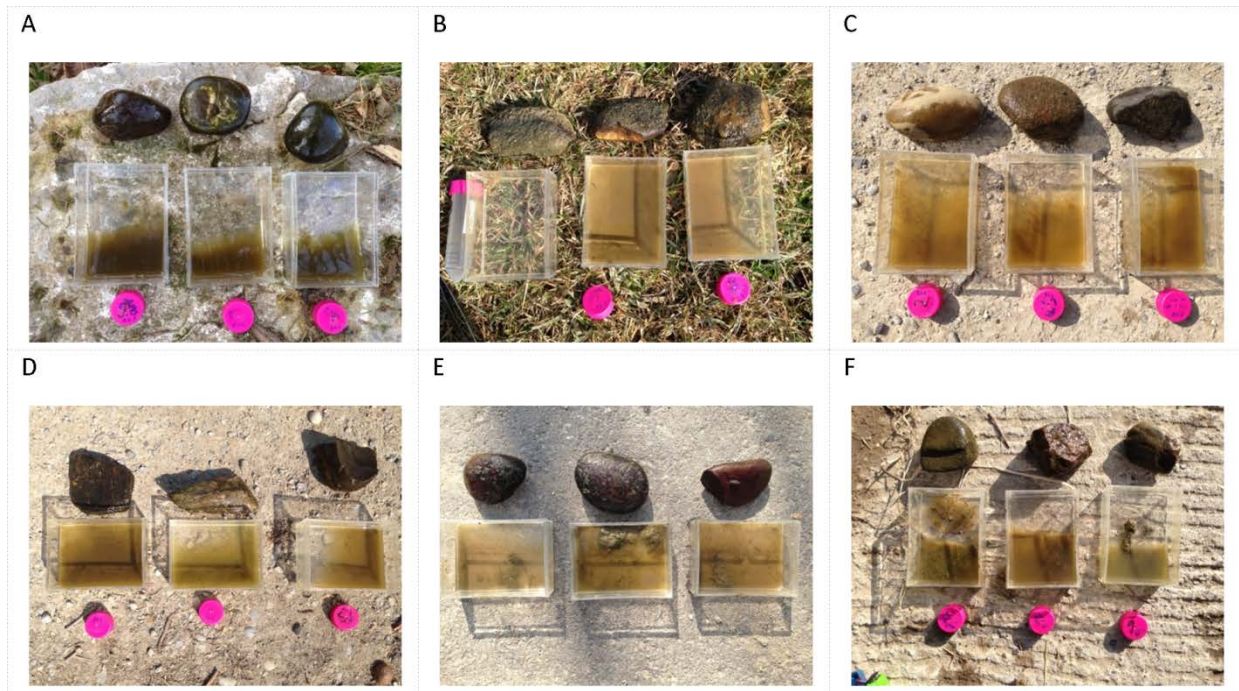

**Supplementary Figure 28** Photographs of the three stones sampled from each of the sites (A-F).



## Supplementary Tables

**Supplementary Table 1** Time needed for individual steps of flow cytometric and data analysis.

| step                                                                        | time needed            | comment                                                                                              |
|-----------------------------------------------------------------------------|------------------------|------------------------------------------------------------------------------------------------------|
| set up flow cytometry protocol based on references                          | 4 h                    | one time only                                                                                        |
| set up data export protocol (for further analysis)                          | 20 min                 | one time only                                                                                        |
| measure reference datasets (about 40)                                       | 2 h                    | one time only                                                                                        |
| measure set of samples                                                      | 1-2 min/sample         | we subsample three times, so calculate 3x 1-2 min /sample, this step is not specific to our protocol |
| export data as *.csv                                                        | 10 sec/file            |                                                                                                      |
| load *.csv files into Matlab, data preparation (normalization, subsampling) | 30 min                 | Depends on the data complexity (number of samples etc)                                               |
| execute viSNE                                                               | 1 h for 150.000 events | depends on computing power                                                                           |
| identify and quantify clusters                                              | 1 h                    |                                                                                                      |

**Supplementary Table 2** Algal and cyanobacterial strains.

| <b>Genus</b>          | <b>Species</b>                  | <b>Bank</b>   | <b>Strain number</b> |
|-----------------------|---------------------------------|---------------|----------------------|
| <i>Achnanthes</i>     | <i>spec</i>                     | CCAC          | CCAC 2681 B          |
| <i>Achnantheidium</i> | <i>minutissimum</i>             | TCC           | TCC746               |
| <i>Anabaena</i>       | <i>spec</i>                     | Eawag isolate |                      |
| <i>Bangia</i>         | <i>atropurpurea</i>             | EPSAG         | 1351-1               |
| <i>Botryococcus</i>   | <i>braunii</i>                  | CCAC          | CCAC 0121            |
| <i>Chamaesiphon</i>   | <i>polonicus</i>                | EPSAG         | 32.87                |
| <i>Chlorella</i>      | <i>spec</i>                     | Eawag isolate |                      |
| <i>Cocconeis</i>      | <i>placentula var. Euglypta</i> | TCC           | TCC720               |
| <i>Craticula</i>      | <i>accomoda</i>                 | TCC           | TCC107               |
| <i>Cyclotella</i>     | <i>meneghiniana</i>             | EPSAG         | 1020-1a              |
| <i>Cymbella</i>       | <i>spec</i>                     | CCAC          | CCAC 2680 B          |
| <i>Diatoma</i>        | <i>spec</i>                     | CCAC          | CCAC 3717 B          |
| <i>Eolimna</i>        | <i>minima</i>                   | TCC           | TCC524               |
| <i>Fragilaria</i>     | <i>perminuta</i>                | TCC           | TCC882               |
| <i>Gomphonema</i>     | <i>parvulum</i>                 | TCC           | TCC653               |
| <i>Gomphonema</i>     | <i>parvulum</i>                 | EPSAG         | 1032-1               |
| <i>Merismopedia</i>   | <i>glauca</i>                   | EPSAG         | 48.79                |
| <i>Microcystis</i>    | <i>aeruginosa</i>               | unknown       | PCC 7806             |
| <i>Mougotia</i>       | <i>spec</i>                     | EPSAG         | 11.96                |
| <i>Nitzschia</i>      | <i>palea</i>                    | TCC           | TCC139-2             |
| <i>Nitzschia</i>      | <i>palea</i>                    | EPSAG         | 1052-3a              |
| <i>Oedogonium</i>     | <i>spec</i>                     | EPSAG         | 54.94                |
| <i>Phormidium</i>     | <i>spec</i>                     | Eawag isolate |                      |
| <i>Pseudanabaena</i>  | <i>galeata</i>                  | EPSAG         | 13.83                |
| <i>Scenedesmus</i>    | <i>acuminatus</i>               | EPSAG         | 38.81                |
| <i>Scenedesmus</i>    | <i>bimorphus</i>                | Eawag isolate |                      |
| <i>Stigeoclonium</i>  | <i>aestivale</i>                | EPSAG         | 477-20               |
| <i>Surirella</i>      | <i>spec</i>                     | CCAC          | CCAC 3461 B          |
| <i>Ulnaria</i>        | <i>ulna</i>                     | TCC           | TCC634               |
| <i>Ulothrix</i>       | <i>mucosa</i>                   | EPSAG         | 56.9                 |

Strains were obtained from Experimental Phycology and Culture Collection of Algae at the University of Goettingen (EPSAG), Culture Collection of Algae at the University of Cologne (CCAC), Thonon Culture Collection (TCC), and University of Texas Culture Collection of Algae (UTEX), or were available at Eawag.

**Supplementary Table 3** Presence/absence of organisms identifiable by light microscopy in samples from natural stream microbial communities after temperature increase.

|                                                  | d0 |   |   |   |   | d7 |   |   |   |   | d14 |   |   |   |   | d21 |   |   |   |   |
|--------------------------------------------------|----|---|---|---|---|----|---|---|---|---|-----|---|---|---|---|-----|---|---|---|---|
|                                                  | 1  | 2 | 3 | 4 | 5 | 1  | 2 | 3 | 4 | 5 | 1   | 2 | 3 | 4 | 5 | 1   | 2 | 3 | 4 | 5 |
| <i>Chamaesiphon polonicus</i>                    | x  | x | x | x | x | x  | x | x | x | x | x   | x | x | x | x | x   | x | x | x | x |
| <i>Achnanthydium spec</i>                        | x  | x | x | x | x | x  | x | x | x | x | x   | x | x | x | x | x   | x | x | x | x |
| <i>Amphora spec</i>                              |    |   |   |   |   |    |   |   |   |   |     |   |   |   |   |     |   |   |   |   |
| <i>Cocconeis spec</i>                            | x  | x | x | x | x | x  | x | x | x | x | x   | x | x | x | x | x   | x | x | x | x |
| <i>Cymbella spec</i>                             | x  |   | x |   |   |    |   |   | x | x | x   | x |   |   |   |     | x |   |   | x |
| <i>Diatoma vulgaris</i>                          | x  | x | x |   | x |    | x | x | x | x |     |   | x |   | x | x   |   | x |   | x |
| <i>Gomphonema olivaceum</i>                      | x  |   |   |   |   |    | x |   |   |   |     |   | x |   |   |     | x | x |   | x |
| <i>Melosira varians</i>                          | x  | x | x |   | x | x  | x | x | x | x | x   | x | x | x |   | x   | x | x | x | x |
| <i>Navicula spec</i>                             |    |   |   |   |   |    |   |   |   |   |     |   |   |   |   | x   | x | x | x | x |
| <i>Nitzschia spec</i>                            | x  | x | x | x | x | x  | x | x | x | x | x   | x | x | x | x | x   | x | x | x | x |
| <i>Rhoicosphenia abbreviata</i>                  | x  | x | x |   | x | x  | x | x | x | x | x   | x | x | x |   | x   | x | x | x | x |
| <i>Stauroneis smithii</i>                        | x  | x | x | x | x | x  | x |   | x | x | x   | x | x | x | x | x   | x | x | x | x |
| <i>Synedra spec</i>                              | x  | x | x | x | x | x  | x |   | x | x | x   |   | x | x |   | x   | x | x | x | x |
| <i>Botryococcus spec</i>                         | x  | x | x | x | x | x  | x | x | x | x | x   | x | x | x | x | x   | x | x | x | x |
| <i>unidentified green algae, small spherical</i> | x  | x | x | x | x |    |   |   |   |   |     |   |   |   |   | x   | x | x | x | x |
| <i>Oedogonium spec</i>                           |    |   |   |   |   |    |   |   |   |   |     |   | x |   |   | x   | x | x | x | x |
| <i>Scenedesmus bijugatus</i>                     |    |   |   |   | 1 |    |   |   |   |   |     |   | 1 |   |   |     |   | 1 |   |   |
| <i>Bangia atropurpurea</i>                       | x  | x | x | x | x | x  | x |   | x | x | x   |   | x | x |   | x   | x | x | x | x |
| <i>Protozoa</i>                                  | x  | x | x | x | x | x  | x | x | x | x | x   | x | x | x | x | x   | x | x | x | x |

Each sample was subsampled three times for microscopy, 300 intact cells per subsample were analysed. Results from subsamples are summed for better readability. x: organism present, 1: single cell found in all three subsamples.

**Supplementary Table 4** Coordinates, water temperature (T), flow rate, pH, electrical conductivity (CD), and description of the six sampling sites on Mönchaltorfer Aa, Canton Zurich, Switzerland.

| Site | Coordinates                   | Distance to spring [km] | T [°C] | Flow rate [m/s] | pH   | CD [mS] | Site Information                                                                                                       |
|------|-------------------------------|-------------------------|--------|-----------------|------|---------|------------------------------------------------------------------------------------------------------------------------|
| A    | N47° 16' 52''<br>E8° 48' 36'' | 0.002                   | 5.7    | <0.01           | 7.11 | 0.68    | Spring, in the forest, shaded by deciduous trees                                                                       |
| B    | N47° 16' 54''<br>E8° 46' 49'' | 2.5                     | 7.4    | 0.11            | 7.94 | 0.54    | Farming area, unshaded                                                                                                 |
| C    | N47° 18' 8''<br>E8° 44' 52''  | 4                       | 9.2    | 0.34            | 8.01 | 0.56    | Straightened, shaded by bushes and deciduous trees                                                                     |
| D    | N47° 18' 10''<br>E8° 44' 47'' | 4.2                     | 11.4   | 0.24            | 7.83 | 0.84    | Straightened, ~10 m behind WWTP* inflow, shaded by bushes and deciduous trees; strong cover of filamentous green algae |
| E    | N47° 19' 6''<br>E8° 42' 54''  | 7.86                    | 11.3   | 0.06            | 7.94 | 0.68    | Straightened, shaded by bushes and deciduous trees; cover of filamentous green algae                                   |
| F    | N47° 19' 46''<br>E8° 43' 2''  | 10.86                   | 9.7    | 0.05            | 7.92 | 0.65    | Between two bridges, in a conservation area, shaded by bushes and deciduous trees                                      |

Measurements were made a few centimeters above the ground near the surface of the sampled stones. \* Waste-water treatment plant (WWTP) Gossau.

**Supplementary Table 5** Land use (percent), area [km<sup>2</sup>] and annual amount of waste water of the six sampling sites.

|   | Agriculture Intensive | Agriculture Extensive | Forest | No vegetation | Traffic infrastructure | Urban areas | others | Area [km <sup>2</sup> ] | WWTP effluent [m <sup>3</sup> /a] |
|---|-----------------------|-----------------------|--------|---------------|------------------------|-------------|--------|-------------------------|-----------------------------------|
| A | 75.00                 | 10.71                 | 10.71  | 0.00          | 0.00                   | 3.57        | 0.00   | 0.26                    | 0                                 |
| B | 60.73                 | 6.50                  | 13.84  | 0.28          | 2.82                   | 6.21        | 9.60   | 3.57                    | 0                                 |
| C | 61.48                 | 7.39                  | 13.40  | 0.24          | 5.41                   | 8.17        | 3.91   | 16.62                   | 0                                 |
| D | 58.91                 | 6.87                  | 13.70  | 0.22          | 5.72                   | 10.55       | 4.03   | 22.49                   | 1801012                           |
| E | 60.20                 | 7.05                  | 12.88  | 0.24          | 5.59                   | 10.13       | 3.90   | 25.40                   | 1801012                           |
| F | 57.24                 | 7.12                  | 15.51  | 0.14          | 5.18                   | 10.95       | 3.85   | 51.07                   | 4131539                           |

**Supplementary Table 6** Concentration of selected water chemistry parameters determined in grab samples at the six sampling sites.

|   | Cl <sup>-</sup> mg/L | NO <sub>3</sub> <sup>2-</sup> mg N/L | SO <sub>4</sub> <sup>2-</sup> mg/L | Na mg/L | Mg mg/L | Ca mg/L | K mg/L | o - P µg/L | D - P µg/L | T - P µg/L | H <sub>4</sub> SiO <sub>4</sub> mg/L | DOC mg/L | TOC mg/L |
|---|----------------------|--------------------------------------|------------------------------------|---------|---------|---------|--------|------------|------------|------------|--------------------------------------|----------|----------|
| A | 69.9                 | 1.2                                  | 5                                  | 29.9    | 22.1    | 112.8   | 25.1   | 17.2       | 19.2       | 1135.0     | 10.3                                 | 3.2      | 20.8     |
| B | 5.6                  | 1.0                                  | 6                                  | 4.2     | 21.0    | 97.3    | 1.1    | 3.8        | 7.3        | 43.6       | 4.8                                  | 3.3      | 3.7      |
| C | 14.2                 | 2.0                                  | 9                                  | 8.4     | 20.5    | 95.3    | 1.7    | 5.8        | 7.6        | 15.4       | 6.2                                  | 2.1      | 2.5      |
| D | 78.4                 | 10.9                                 | 48                                 | 57.1    | 19.0    | 98.2    | 16.0   | 5.6        | 14.8       | 23.3       | 12.6                                 | 3.4      | 3.6      |
| E | 38.0                 | 5.4                                  | 23                                 | 24.6    | 18.8    | 96.5    | 6.1    | 3.8        | 8.3        | 13.1       | 9.3                                  | 2.8      | 3.0      |
| F | 44.6                 | 5.3                                  | 26                                 | 29.3    | 21.1    | 93.0    | 6.1    | 56.6       | 66.8       | 73.3       | 6.7                                  | 2.6      | 2.8      |

**Supplementary Table 7** Presence/absence of organisms identifiable in the three field samples per site A-F by light microscopy.

|                                                  | A |   |   | B |   |   | C |   |   | D |   |   | E |   |   | F |   |    |
|--------------------------------------------------|---|---|---|---|---|---|---|---|---|---|---|---|---|---|---|---|---|----|
|                                                  | 1 | 2 | 3 | 1 | 2 | 3 | 1 | 2 | 3 | 1 | 2 | 3 | 1 | 2 | 3 | 1 | 2 | 3  |
| <i>Phormidium autumnale</i>                      |   |   |   | x | x | x |   |   |   |   |   |   |   |   |   |   |   |    |
| <i>Phormidium spec</i>                           | x | x | x |   |   |   |   |   |   |   |   |   |   |   |   |   |   |    |
| <i>Achnanthydium spec</i>                        | x | x | x | x |   | x | x | x | x | x | x | x | x | x | x |   |   |    |
| <i>Amphora spec</i>                              |   |   |   |   |   | x | x |   | x | x |   | x | x | x | x | x | x |    |
| <i>Cocconeis spec</i>                            | x | x | x | x | x | x | x | x | x | x | x | x | x | x | x | x | x | x  |
| <i>Cyclotella spec</i>                           |   |   |   |   |   |   | x | x | x |   | x |   |   |   |   |   |   |    |
| <i>Cymatopleura solea</i>                        |   |   |   | 1 |   |   |   |   |   |   |   |   | 1 |   |   |   |   |    |
| <i>Cymbella spec</i>                             |   |   |   | x | x |   | x | x | x | x | x | x | x | x | x | x | x | x  |
| <i>Denticula tenuis</i>                          |   |   |   |   |   |   |   |   |   |   |   |   |   |   |   | 1 |   |    |
| <i>Diatoma vulgare</i>                           |   |   |   | x |   | x | x | x | x | x | x | x | x | x | x |   | x | x  |
| <i>Gomphonema truncatum</i>                      |   |   | x |   |   |   |   |   |   |   |   |   |   |   |   |   |   |    |
| <i>Gomphonema olivaceum</i>                      | x | x | x |   | x | x | x | x | x | x |   | x | x | x | x | x | x | x  |
| <i>Gyrosigma attenuatum</i>                      |   |   |   |   | x |   |   |   |   |   |   |   | x |   |   |   | x |    |
| <i>Melosira varians</i>                          |   |   |   |   |   |   | x |   |   |   |   |   | x | x | x | x | x | x  |
| <i>Meridion circulare</i>                        |   |   |   | x | x |   | x | x | x |   |   |   |   |   |   |   |   |    |
| <i>Navicula spec</i>                             | x | x | x | x | x | x | x | x | x |   | x |   | x | x |   | x | x | x  |
| <i>Nitzschia spec</i>                            | x |   |   | x |   |   | x | x |   | x | x |   | x | x |   | x | x | x  |
| <i>Rhoicosphenia abbreviata</i>                  | x | x | x | x |   |   | x | x | x | x | x |   |   |   |   |   | x | x  |
| <i>Stauroneis smithii</i>                        | x |   | x | x | x |   | x | x | x | x | x | x | x | x | x | x | x | x  |
| <i>Surirella brebissonii</i>                     | x | x | x | x | x | x | x | x | x | x | x |   | x | x |   | x | x | x  |
| <i>Synedra spec</i>                              |   |   |   |   |   | x | x | x | x |   |   |   | x |   |   |   | x | x  |
| <i>Tabellaria flocculosa</i>                     |   |   |   |   |   |   |   |   |   |   |   |   |   |   |   |   | x |    |
| <i>Botryococcus spec</i>                         | x |   | x |   |   |   |   | x | x | x |   |   |   |   |   |   | x | x  |
| <i>unidentified green algae, small spherical</i> | x | x | x | x | x | x | x | x | x | x | x | x | x | x | x | x | x | x  |
| <i>Oedogonium spec</i>                           | x | x | x | x | x | x |   | x | x | x | x | x | x | x | x |   |   |    |
| <i>Scenedesmus bijugatus</i>                     |   |   |   |   |   |   | 1 |   |   |   |   |   |   |   |   |   |   |    |
| <i>Ulothrix spec</i>                             |   |   |   |   |   |   |   |   |   |   |   |   |   |   |   |   |   | x  |
| <i>Red algae, small, colonial</i>                | x | x | x | x | x | x |   | x | x | x | x | x | x | x | x | x | x | x  |
| <i>Protozoa</i>                                  | x | x | x |   |   |   |   |   |   |   |   |   |   |   |   |   |   | 1* |

Each sample was subsampled three times for microscopy, 300 intact cells per subsample were analysed. Results from subsamples were summed for better readability. x: organism present; 1: single cell found in all three subsamples; \*Thecamoeba

**Supplementary Table 8** Detectability of selected protozoa by the flow cytometry protocol established in this study.

| Species name                      | taxonomic group | Detectable by established flow cytometry protocol |
|-----------------------------------|-----------------|---------------------------------------------------|
| <i>Chilomonas sp.</i>             | ciliate         | Yes                                               |
| <i>Colpidium sp.</i>              | ciliate         | Yes                                               |
| <i>Euplotes aediculatus</i>       | ciliate         | No (too high FS)                                  |
| <i>Paramecium aurelia</i>         | ciliate         | No (too high FS)                                  |
| <i>Cephalodella sp.</i>           | rotifer         | No (too high FS)                                  |
| <i>Tetrahymena cf. pyriformis</i> | ciliate         | Yes                                               |

**Supplementary Table 9** Medium LA composition given in [mM].

| Component                                           | Concentration [mM] |
|-----------------------------------------------------|--------------------|
| Ca(NO <sub>3</sub> ) <sub>2</sub> 4H <sub>2</sub> O | 0.1                |
| MgSO <sub>4</sub> 7H <sub>2</sub> O                 | 0.15               |
| NaHCO <sub>3</sub>                                  | 6.2                |
| K <sub>2</sub> HPO <sub>4</sub> 3H <sub>2</sub> O   | 0.005              |
| NH <sub>4</sub> NO <sub>3</sub>                     | 0.1                |
| NaNO <sub>3</sub>                                   | 0.1                |
| Na <sub>2</sub> SiO <sub>3</sub> 5H <sub>2</sub> O  | 0.05               |
| CaCl <sub>2</sub> 2H <sub>2</sub> O                 | 0.25               |
| KNO <sub>3</sub>                                    | 0.1                |
| H <sub>3</sub> BO <sub>3</sub>                      | 0.05               |
| ZnSO <sub>4</sub> 7H <sub>2</sub> O                 | 0.000158           |
| MnCl <sub>2</sub> 4H <sub>2</sub> O                 | 0.00122            |
| CoCl <sub>2</sub> 6H <sub>2</sub> O                 | 0.00005            |
| CuSO <sub>4</sub>                                   | 0.000163           |
| Na <sub>2</sub> MoO <sub>4</sub> 2H <sub>2</sub> O  | 0.00008            |
| FeCl <sub>3</sub> 6H <sub>2</sub> O                 | 0.0009             |
| Na <sub>2</sub> EDTA                                | 0.02               |

Components 1-9 are mixed and autoclaved, components 10-17 are mixed and sterile-filtered (0.22 μm).

**Supplementary Table 10** Oxygen concentration (average of 7 measurements within 1 min) 10 h after the start of the light period after 21 d; electrical conductivity (CD) and pH 4 h after the start of the light period on d 1, d 7, d 14, and d 21 of the experiment.

| Microcosm | O <sub>2</sub><br>[mg/L] | Electrical conductivity [mS] |       |       |       | pH   |      |      |      |
|-----------|--------------------------|------------------------------|-------|-------|-------|------|------|------|------|
|           |                          | d 1                          | d 7   | d 14  | d 21  | d 1  | d 7  | d 14 | d 21 |
| 1         | 7.7                      | 0.653                        | 0.686 | 0.68  | 0.664 | 8.58 | 8.5  | 8.25 | 8.25 |
| 2         | 7.9                      | 0.647                        | 0.625 | 0.649 | 0.645 | 8.58 | 8.8  | 8.42 | 8.4  |
| 3         | 7.9                      | 0.627                        | 0.616 | 0.652 | 0.687 | 8.62 | 8.8  | 8.41 | 8.41 |
| 4         | 7.8                      | 0.663                        | 0.662 | 0.647 | 0.658 | 8.58 | 8.8  | 8.38 | 8.41 |
| 5         | 7.7                      | 0.655                        | 0.656 | 0.658 | 0.67  | 8.48 | 8.79 | 8.32 | 8.35 |

**Supplementary Table 11** Gallios flow cytometer hardware and software settings.

| Parameter | Laser [nm] | Dicropic splitter | Filter/band width [nm] | Voltage | Gain |
|-----------|------------|-------------------|------------------------|---------|------|
| FSC*      | 488        | -                 | -                      | 10      | 2    |
| SSC       | 488        | -                 | -                      | 10      | 1    |
| FL1       | 488        | 525               | 510/20                 | 519     | 1    |
| FL2       | 488        | 550               | 542/27                 | 636     | 1    |
| FL3       | 488        | 595               | 575/30                 | 759     | 1    |
| FL4       | 488        | 655               | 620/30                 | 701     | 1    |
| FL5       | 488        | -                 | 695/30                 | 495     | 1    |
| FL6       | 638        | 710               | 660/20                 | 250     | 1    |
| FL7       | 638        | 750               | 725/20                 | 250     | 1    |
| FL8       | 638        | -                 | 755/LP                 | 250     | 1    |
| FL9       | 405        | 480               | 450/50                 | 386     | 1    |
| FL10      | 405        | -                 | 525/40                 | 347     | 1    |

\*set to 1-19°

**Supplementary Table 12** MoFlo AstriosEQ hardware setting and applied gating cut-offs for sorting of microplastic particles as assessed by PS and viSNE fluorescence intensities. \* Used cut-off values for sorting. Others are maximum or minimum values where sorted particles would occur in the respective parameter.

| Parameter      | Laser [nm] | Dicroic splitter before detector | Filter/band width [nm] | Voltage | Gain | Signal   | Data resolution | cut-off PS | Sorting cut-off microplastic |
|----------------|------------|----------------------------------|------------------------|---------|------|----------|-----------------|------------|------------------------------|
| FSC1 (M1 mask) | 488        | -                                | 488/6                  | 244     | 1    | Area     | 256             | -          | -                            |
| FSC2 (P3 mask) | 488        | -                                | 488/6                  | 225     | 1    | Area     | 256             | -          | -                            |
| SSC            | 488        | 495 SP                           | 488/6                  | 223     | 1    | Area     | 256             | -          | -                            |
| FL1            | 488        | 495 SP                           | 513/26                 | 584     | 1    | Log-Area | 10 <sup>7</sup> | <87000     | <110000                      |
| FL2            | 488        | 525 SP                           | 542/27                 | 635     | 1    | Log-Area | 10 <sup>7</sup> | <110000    | <64000                       |
| FL3            | 488        | 558LP                            | 576/21                 | 548     | 1    | Log-Area | 10 <sup>7</sup> | <90000     | <90000*                      |
| FL4            | 488        | 681 LP                           | 620/29                 | 458     | 1    | Log-Area | 10 <sup>7</sup> | <36000     | <36000*                      |
| FL5            | 488        | 681 LP                           | 695/30                 | 432     | 1    | Log-Area | 10 <sup>7</sup> | <900       | <328*                        |
| FL6            | 640        | 650 SP                           | 660 LP                 | 286     | 1    | Log-Area | 10 <sup>7</sup> | <700       | <700                         |
| FL7            | 640        | 695 LP                           | 722/44                 | 425     | 1    | Log-Area | 10 <sup>7</sup> | <14000     | <16000*                      |
| FL8            | 640        | 755 LP                           | 755/LP                 | 278     | 1    | Log-Area | 10 <sup>7</sup> | <600       | <700                         |
| FL9            | 355        | 480 LP                           | 448/59                 | 549     | 1    | Log-Area | 10 <sup>7</sup> | >250000    | >70000*                      |
| FL10           | 355        | 650 SP                           | 525 LP                 | 804     | 1    | Log-Area | 10 <sup>7</sup> | >5000      | -                            |
